# Supplementary material for: Effects of stem cells from inducible brown adipose tissue on diet-induced obesity in mice
Source: PubMed Central journal article supplement (PMC8260805; doi:10.1038/s41598-021-93224-6), 2021-07-06
Supplement: 41598_2021_93224_MOESM1_ESM.pdf [file 41598_2021_93224_MOESM1_ESM.pdf]

**Effects of stem cells from inducible brown adipose tissue on diet-induced obesity in mice**

Enrique Calvo<sup>1,2</sup>, Noelia Keiran<sup>1,2,3</sup>, Catalina Núñez-Roa<sup>1,2</sup>, Elsa Maymó-Masip<sup>1,2</sup>,  
Miriam Ejarque<sup>1,2</sup>, Joan Sabadell-Basallote<sup>1,2,3</sup>, María del Mar Rodríguez<sup>1,2</sup>, Victòria  
Ceperuelo-Mallafré<sup>1,2</sup>, Jesús Seco,<sup>1,2</sup> Ester Benaiges<sup>1,2,3</sup>, Theodora Michalopoulou<sup>1</sup>,  
Rosa Jorba<sup>4</sup>, Joan Vendrell<sup>1,2,3\*</sup>, Sonia Fernández-Veledo<sup>1,2\*</sup>

**Suppl. Table S1.** Mice gene expression Taqman probes. Results were calculated using the comparative Ct method and expressed relative to the expression of the housekeeping gene 18S.

| Detector                      | Taqman probes                  | Gene probes                                                           |
|-------------------------------|--------------------------------|-----------------------------------------------------------------------|
| <b>Stem cell markers</b>      |                                |                                                                       |
| NANOG                         | Hs02387400_m1                  | NANOG homeobox                                                        |
| OCT-4                         | Hs01570480_m1                  | Octamer-binding transcription factor                                  |
| <b>Inflammatory markers</b>   |                                |                                                                       |
| IL1b                          | Mm00434228_m1                  | Interleukin 1 Beta                                                    |
| IL12b                         | Mm22818759_m1                  | Interleukin 12 Beta                                                   |
| IL6                           | Mm00446190_m1                  | Interleukin 6                                                         |
| TNF- $\alpha$                 | Mm00443258_m1                  | Tumor necrosis factor alpha                                           |
| <b>Lipid metabolism genes</b> |                                |                                                                       |
| PPAR $\gamma$                 | Hs01115513_m1<br>Mm00440940_m1 | Peroxisome proliferator-activated receptor gamma                      |
| FABP4                         | Hs01086177_m1                  | Fatty acid-binding protein 4                                          |
| ADIPOQ                        | Hs00605917_m1                  | Adiponectin                                                           |
| HSL                           | Mm00495359_m1                  | Hormone-sensitive lipase                                              |
| SREBP-1c                      | Mm00550338_m1                  | Sterol regulatory element-binding transcription factor 1              |
| ACC                           | Mm01304257_m1                  | Acetyl-CoA carboxylase                                                |
| ATGL                          | Mm00503040_m1                  | Adipose Triglyceride Lipase                                           |
| CPT1 $\alpha$                 | Mm1843037_m1                   | Carnitine palmitoyltransferase 1                                      |
| <b>Browning genes</b>         |                                |                                                                       |
| TMEM26                        | Hs00415619_m1                  | Transmembrane Protein 26                                              |
| TBX1                          | Hs00962558_g1                  | T-box 1                                                               |
| PRDM16                        | Hs00223161_m1                  | PR-domain containing 16                                               |
| ZIC1                          | Hs00602749_m1                  | Zinc finger transcription factor 1                                    |
| PGC1 $\alpha$                 | Hs00173304_m1                  | Peroxisome proliferator-activated receptor-gamma coactivator 1- alpha |
| <b>Housekeeping</b>           |                                |                                                                       |
| 18S rRNA                      | Mm03928990_g1                  | 18S ribosomal RNA                                                     |

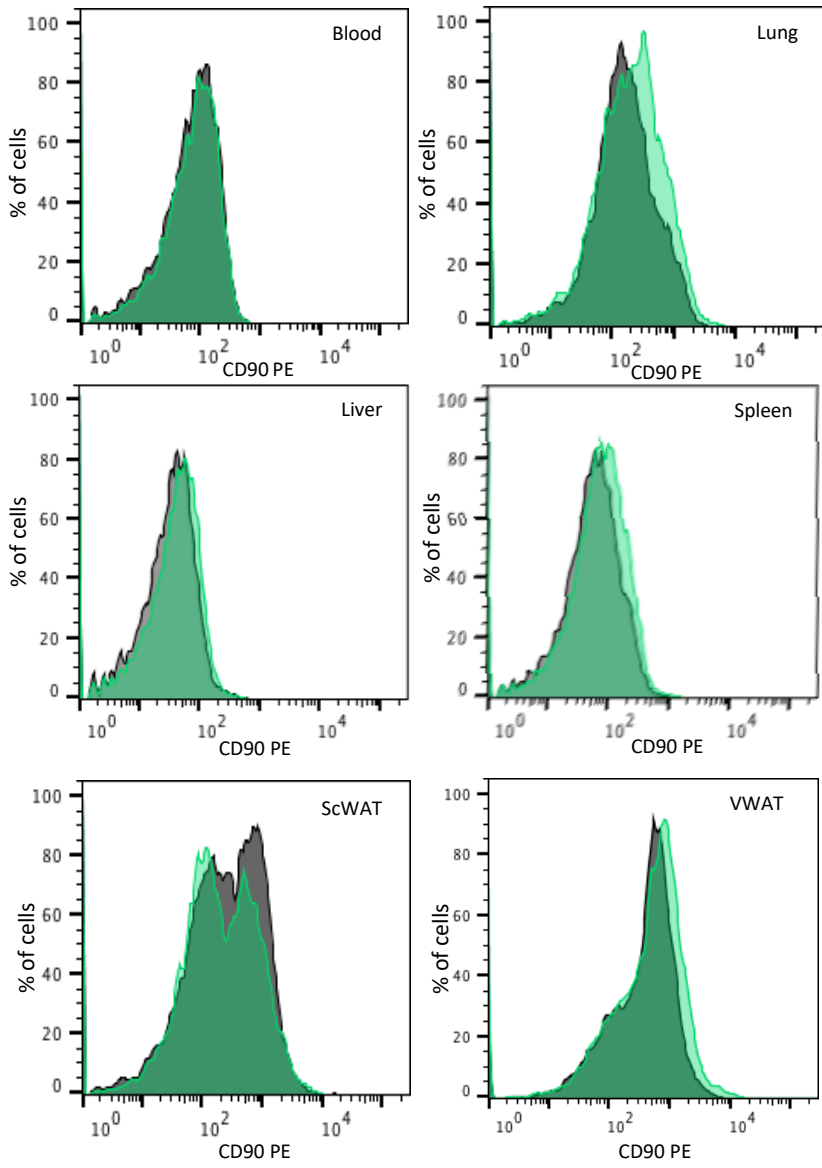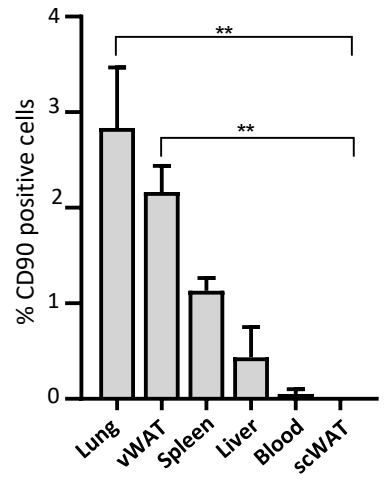

Suppl. Fig. S1. ASCs injection mainly accumulate in lung and vWAT. Percentage of CD90 positive cells in lung, vWAT, spleen, liver, blood and scWAT. Results are expressed as mean  $\pm$  s.e.m.; \*\* $P < 0.01$ , (one-way ANOVA).

Regarding the “chopping” of some immunoblots, we would like to clarify that we design each experiment so that we can perform the analysis of as many parameters as possible on precisely the very same membrane in order to avoid repeated stripping (thus minimizing stripping-derived interferences in Western Blot signals), and also to diminish loading-derived differences since we test multiple proteins in exactly the same lane. This implies that sometimes each membrane is blotted with several antibodies at the same time when this is allowed by the electrophoretic migration of the bands that are to be studied. The subsequent digital acquisition of the image is sometimes performed on the whole membrane but, for the sake of clarity, the image is then subdivided in as many sections as required for the number of proteins analyzed (thereby the “chopping” of the final image shown in the figure). Almost every membrane is treated in this way for the sake of reliability and reproducibility. In the case of p-HSL/HSL, the membrane was stripped and reprobed. Also note that different membranes are labeled as Mb1, Mb2, Mb3, Mb4 and Mb5.

### Full unedited gels for Figure 3C

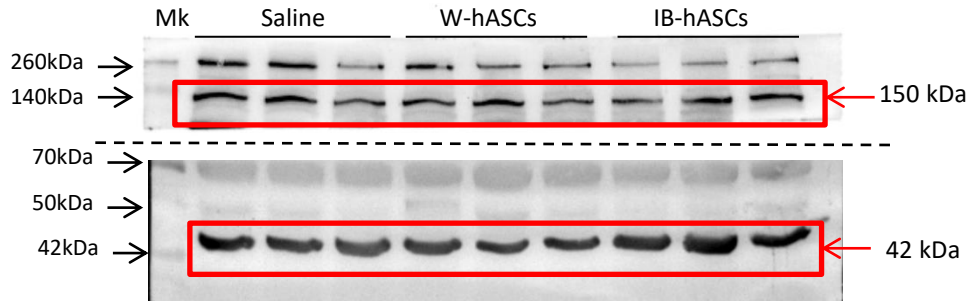

Membrane 1 → vWAT

Upper membrane: anti-SREBP-1c

Lower membrane: anti-β-actin

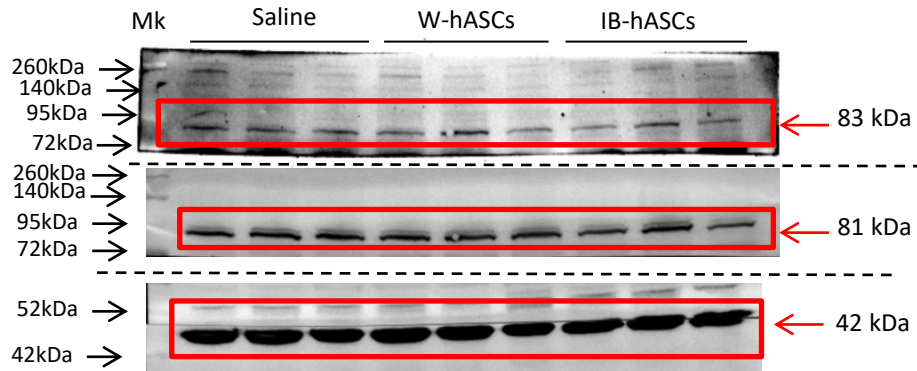

Membrane 2 → vWAT

Upper membrane: anti-pHSL

Median membrane: anti-HSL

Lower membrane: anti-β-actin

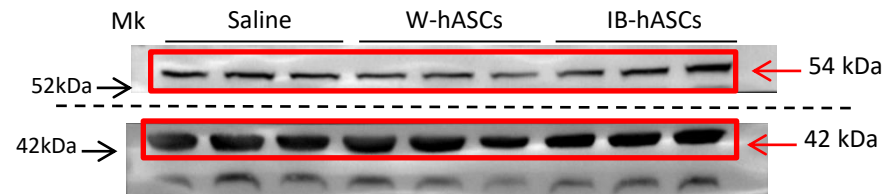

Membrane 3 → vWAT

Upper membrane: anti-ATGL

Lower membrane: anti-β-actin

### Full unedited gels for Figure 3E

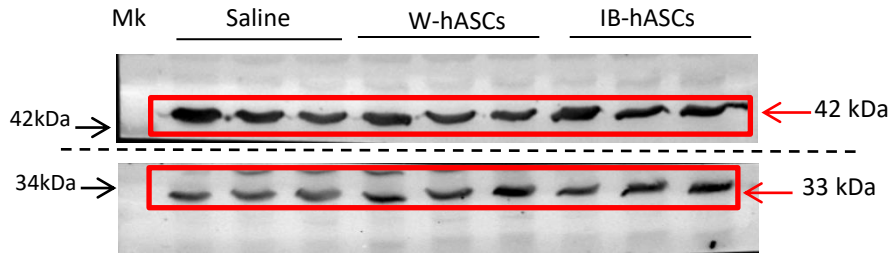

Membrane 4 → vWAT  
Upper membrane: anti- $\beta$ -actin  
Lower membrane: anti-UCP1

### Full unedited gels for Figure 4C

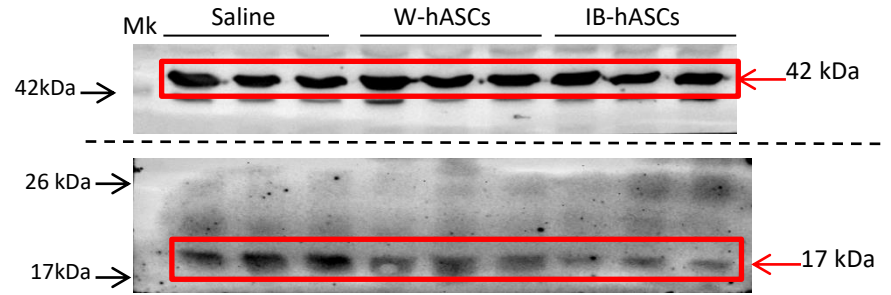

Membrane 5 → vWAT  
Upper membrane: anti- $\beta$ -actin  
Lower membrane: anti-IL1 $\beta$

(a)

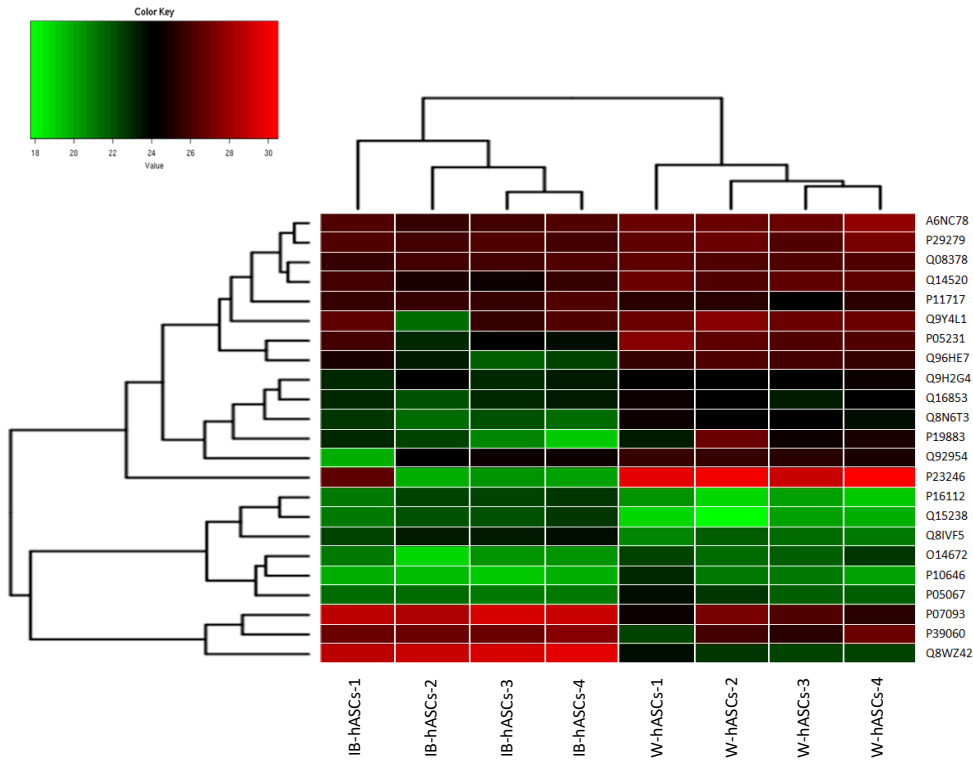

(b)

| Protein ID | Description                                                             | GO biological process                                                              |
|------------|-------------------------------------------------------------------------|------------------------------------------------------------------------------------|
| A6NC78     | Putative golgin subfamily A member 8I [GOLGA8IP]                        | Golgi organization                                                                 |
| P29279     | CCN family member 2 [CNN2]                                              | Cell adhesion, extracellular matrix constituent secretion, cell migration          |
| Q08378     | Golgin subfamily A member 3 [GOLGA3]                                    | Spermatogenesis                                                                    |
| Q14520     | Hyaluronan-binding protein 2 [HABP2]                                    | Cell adhesion, proteolysis                                                         |
| P11717     | Cation-independent mannose-6-phosphate receptor [IGF2R]                 | Lysosomal transport, animal organ regeneration                                     |
| Q9Y4L1     | Hypoxia up-regulated protein 1 [HYOU1]                                  | Endoplasmic reticulum to Golgi vesicle-mediated transport                          |
| P05231     | Interleukin-6 [IL6]                                                     | Inflammatory response, glucose homeostasis,                                        |
| Q96HE7     | ERO1-like protein alpha [ERO1A]                                         | Extracellular matrix organization                                                  |
| Q9H2G4     | Testis-specific Y-encoded-like protein 2 [TSPYL2]                       | Negative regulation of cell cycle and cell growth                                  |
| Q16853     | Membrane primary amine oxidase [AOC3]                                   | Cell adhesion, inflammatory response                                               |
| Q8N6T3     | ADP-ribosylation factor GTPase-activating protein 1 [ARFGAP1]           | Endoplasmic reticulum to Golgi vesicle-mediated transport                          |
| P19883     | Follistatin [FST]                                                       | Cell differentiation, multicellular organism development                           |
| Q92954     | Proteoglycan 4 [PRG4]                                                   | Immune response                                                                    |
| P23246     | Splicing factor, proline- and glutamine-rich [SFPQ]                     | mRNA processing, innate immune response                                            |
| P16112     | Aggrecan core protein [ACAN]                                            | Extracellular matrix organization, cell adhesion                                   |
| Q15238     | Pregnancy-specific beta-1-glycoprotein 5 [PSG5]                         | Female pregnancy                                                                   |
| Q8IVF5     | T-lymphoma invasion and metastasis-inducing protein 2 [TIAM2]           | Activation of GTPase activity, positive regulation of apoptotic process            |
| O14672     | Disintegrin and metalloproteinase domain-containing protein 10 [ADAM10] | Extracellular matrix disassembly, positive regulation of cell growth and migration |
| P10646     | Tissue factor pathway inhibitor [TFPI]                                  | Blood coagulation                                                                  |
| P05067     | Amyloid-beta precursor protein [APP]                                    | Extracellular matrix organization, positive regulation of mitotic cell cycle       |
| P07093     | Glia-derived nexin [SERPINE2]                                           | Regulation of cell migration, secretion by cell                                    |
| P39060     | Collagen alpha-1(XVIII) chain [COL18A1]                                 | Cell adhesion, extracellular matrix organization                                   |
| Q8WZ42     | Titin [TTN]                                                             | Muscle contraction, shivering and non-shivering thermogenesis                      |

**Suppl. Fig. S2. Analysis of hASC protein secretomes.** Untargeted proteomics approach by liquid chromatography coupled to tandem mass spectrometry was used to identify and quantify the secreted factors from hASCs isolated from adipose tissue surrounding the pheochromocytoma (IB-hASCs 1–4) and from visceral adipose tissue from lean and healthy subjects (W-hASCs 1–4). A total of 3555 proteins were identified by proteomic analysis in 6-hour conditioned media of hASCs. After removal of conflictive protein entries, related to low quality or noisy mass spectrometry intensity peaks, and retaining only those proteins found in at least 4 patients, a total of 2927 proteins were filtered for statistical analysis. Protein expression data was log<sub>2</sub>-transformed to reduce skewness distributions. An unpaired Mann-Whitney test was used to identify a total of 23 high-to-medium quality protein entries with an adjusted p-value < 0.05 after Bonferroni correction (a). Table describing the secreted factors and their more relevant biological functions (b).

## **LIQUID CHROMATOGRAPHY-MASS SPECTROMETRY METHODS**

### **Sample preparation**

ASCs cultures in passage 6 were plated at a density of 12,000 cells/cm<sup>2</sup> in 35 mm culture plates (Nunc, Denmark) and allowed to grow for 24 hours. The plates were firstly washed with PBS without Ca<sup>2+</sup>/Mg<sup>2+</sup> (Invitrogen, USA), and next, stromal medium without FBS was added. After 9h, the conditioned media (CM) was collected and frozen at -80 °C until it was required.

400uL of CM samples were concentrated to 50uL in Amicon Ultra 3K columns (Milipore). Samples in 6M urea were then reduced with dithiothreitol (30 nmol, 37 °C, 60 min) and alkylated in the dark with iodoacetamide (60 nmol, 25 °C, 30 min). The resulting protein extract was first diluted to 2M urea with 200 mM ammonium bicarbonate for digestion with endoproteinase LysC (1:10 w:w, 37°C, o/n, Wako, cat # 129-02541), and then diluted 2-fold with 200 mM ammonium bicarbonate for trypsin digestion (1:10 w:w, 37°C, 8h, Promega cat # V5113). After digestion, peptide mix was acidified with formic acid and desalted with a MicroSpin C18 column (The Nest Group, Inc) prior to LC-MS/MS analysis.

### **LCMS analysis**

Samples were analyzed using a LTQ-Orbitrap Fusion Lumos mass spectrometer (Thermo Fisher Scientific, San Jose, CA, USA) coupled to an EASY-nLC 1200 (Thermo Fisher Scientific (Proxeon), Odense, Denmark). Peptides were loaded directly onto the analytical column and were separated by reversed-phase chromatography using a 50-cm column with an inner diameter of 75 µm, packed with 2 µm C18 particles spectrometer (Thermo Scientific, San Jose, CA, USA).



Chromatographic gradients started at 95% buffer A and 5% buffer B with a flow rate of 300 nl/min for 5 minutes and gradually increased to 25% buffer B and 75% A in 79 min and then to 40% buffer B and 60% A in 11 min. After each analysis, the column was washed for 10 min with 10% buffer A and 90% buffer B. Buffer A: 0.1% formic acid in water. Buffer B: 0.1% formic acid in 80% acetonitrile.

The mass spectrometer was operated in positive ionization mode with nanospray voltage set at 2.4 kV and source temperature at 305°C. The acquisition was performed in data-dependent acquisition (DDA) mode and full MS scans with 1 micro scans at resolution of 120,000 were used over a mass range of m/z 350-1400 with detection in the Orbitrap mass analyzer. Auto gain control (AGC) was set to 4E5 and charge state filtering disqualifying singly charged peptides was activated. In each cycle of data-dependent acquisition analysis, following each survey scan, the most intense ions above a threshold ion count of 10000 were selected for fragmentation. The number of selected precursor ions for fragmentation was determined by the “Top Speed” acquisition algorithm and a dynamic exclusion of 60 seconds. Fragment ion spectra were produced via high-energy collision dissociation (HCD) at normalized collision energy of 28% and they were acquired in the ion trap mass analyzer. AGC was set to 2E4 and an isolation window of 0.7 m/z and a maximum injection time of 12 ms were used. All data were acquired with Xcalibur software.

Digested bovine serum albumin (New England Biolabs cat # P8108S) was analyzed between each sample to avoid sample carryover and to assure stability of the instrument and QCloud<sup>59</sup> has been used to control instrument longitudinal performance during the project.

## Data Analysis

Acquired spectra were analyzed using the Proteome Discoverer software suite (v2.3, Thermo Fisher Scientific) and the Mascot search engine (v2.6, Matrix Science)<sup>60</sup>. The data were searched against a Swiss-Prot human database plus a list of common contaminants and all the corresponding decoy entries<sup>61</sup>. For peptide identification a precursor ion mass tolerance of 7 ppm was used for MS1 level, trypsin was chosen as enzyme, and up to three missed cleavages were allowed. The fragment ion mass tolerance was set to 0.5 Da for MS2 spectra. Oxidation of methionine and N-terminal protein acetylation were used as variable modifications whereas carbamidomethylation on cysteines was set as a fixed modification. False discovery rate (FDR) in peptide identification was set to a maximum of 1%. Protein abundance was estimated as the average peak area of the 3 most intense peptides for a given protein.

Differential enrichment was done using DEP package that provides an integrated analysis workflow for robust and reproducible analysis of mass spectrometry proteomics data<sup>62</sup>. Briefly, identified proteins were filtered to keep those detected in all, or all but one, replicates of at least one condition, resulting in 23 proteins retained. The filtered data was then background corrected and normalized by variance stabilizing transformation<sup>63</sup>. Protein-wise linear models combined with empirical Bayes statistics were used for the differential enrichment analysis using limma package<sup>64</sup>.

## REFERENCES

59. Chiva, C. *et al.* QCloud: A cloud-based quality control system for mass spectrometry-based proteomics laboratories. *PLoS One* **11**, 13 (2018).
60. Perkins, D. N., Pappin, D. J., Creasy, D. M. & Cottrell, J. S. Probability-based protein

identification by searching sequence databases using mass spectrometry data. *Electrophoresis* **20**, 3551-3567 (1999).

61. Beer, L. A., *et al.* Efficient quantitative comparisons of plasma proteomes using label-free analysis with MaxQuant. *Methods Mol Biol.* **1619**, 339-352 (2017).
62. Zhang X., *et al.* Proteome-wide identification of ubiquitin interactions using UbIA-MS. *Nature Protocols* **13**, 530–550 (2018).
63. Välikangas *et al.* *Briefings in Bioinformatics*.  
<https://academic.oup.com/bib/article/19/1/1/2562889> (2016).
64. Ritchie M.E., *et al.* “limma powers differential expression analyses for RNA-sequencing and microarray studies.” *Nucleic Acids Research*, doi: 10.1093/nar/gkv007 (2015).
